# Supplementary material
Source: ML conference proceedings conference paper supplement (https://openreview.net/forum?id=aa8KsqfTPa)
Supplement: supplementary_material [file attachment]

---

# MarioGPT: Open-Ended Text2Level Generation through Large Language Models

---

Anonymous Author(s)

Affiliation

Address

email

## 1 Prompt Details

Prompts are represented as combinations of specific features (e.g. pipes, enemies, blocks, elevation) alongside quantitative keywords:

- { *no, little, some, many, [0-1000]* } *pipes*
- { *no, little, some, many, [0-1000]* } *enemies*
- { *little, some, many, [0-1000]* } *blocks*
- { *low, high* } *elevation*

As an example, "*no pipes, many enemies, low elevation*" or "*many pipes, many enemies, many blocks*" are both possible prompts. The keywords "no", "little", "some", "many" are calculated from quantiles of the corresponding count (within a 50 column window), as detailed in Table 1. The "low" and "high" elevation are determined from the height of the highest unbreakable blocks in a segment of the level.

Table 1: Prompt Quantiles and corresponding counts within a 50 column window

| tile    | no | little | some | many |
|---------|----|--------|------|------|
| pipes   | 0  | 1      | 2    | 5    |
| enemies | 0  | 1      | 3    | 7    |
| blocks  | 0  | 50     | 75   | 176  |

## 2 Dataset Details

Table 2: Unique Mario tiles

| Tile Type        | Symbol | Visualization                                                                     |
|------------------|--------|-----------------------------------------------------------------------------------|
| Empty            | -      |  |
| Unbreakable      | X      |  |
| Breakable        | S      |  |
| Question Block   | ? / Q  |  |
| Coin             | o      |  |
| Enemy            | E      |  |
| Left pipe top    | <      |  |
| Right pipe top   | >      |  |
| Left pipe lower  | [      |  |
| Right pipe lower | ]      |  |
| Cannon Top       | B      |  |
| Cannon Body      | b      |  |
| Path             | x      |  |

## 3 Generation from single seed

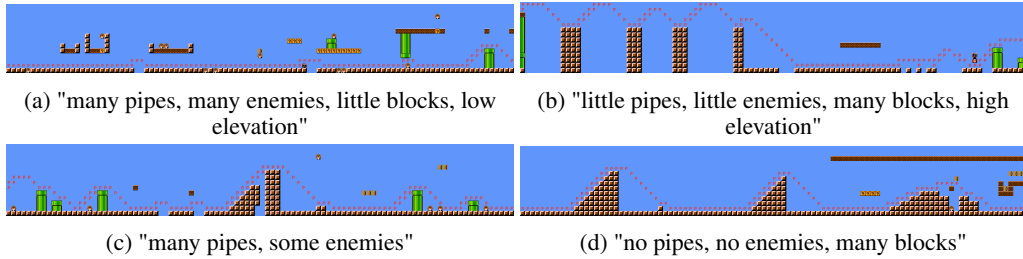

Figure 1: Prompt-conditioned generations from a single seed block. MarioGPT is able to create diverse levels solely based on a text prompt in natural language.
